# Supplementary material for: PKC-mediated phosphorylation governs the stability and function of CELF1 as a driver of EMT in breast epithelial cells
Source: PubMed Central journal article supplement (PMC11585768; doi:10.1016/j.jbc.2024.107826), 2024-09-27
Supplement: mmc1.pdf [file mmc1.pdf]

**a**  
 MAAF**K**LDLPEMMVDHCSLNSSPV**S****K**KMNGTLDHPDQPDLD**A**I**K**MFVGGQVP**R**TWSE**K**DLRELFEQYGAVYEIN**V**L**R**  
 D**R**SQNPPQ**S****K**GCCFVTFY**T****R**KAALEAQNALHNM**K**VLPGMHHPIQM**K**PADSE**K**NNAVED**R**KLFIGMIS**K**KCTENDIR  
 VMFSSFGQIE**C**RIL**R**GPDGL**S****R**GCAFVTF**T****R**AMAQT**A**I**K**AMHQAQ**T**MEGCSSPM**V**V**K**FAD**T**Q**K**D**K**E**Q****K**R**M**A**Q****Q**  
**L**Q**Q**M**Q****Q****J**SAASVWGNLAGLNTLGPQYLALYLQLLQQTASSGNLNTLSSLHPMGGLNAMQLQNLAAALAAAASAA**Q**  
**N**TPSGTNAL**T****S****S****S****P**L**S****V**L**T****S****S****A**G**S****S****P****S****S****S****S****N**S**V**NPIASLGALQTLAGATAGLNVGSLAGMAALNGGLGSSGLSNGT**G****S**  
**T**MEAL**T**QAYSGIQ**Q**YAAAALPTLYNQ**L**L**T**Q**S**IGAAG**S****Q****K**EGPEGANLFYHLPQEFGDQDLLQMFM**P**FGNV**S**A**K**  
 VFID**K**QTNLS**K**CFGFVSYDNPVSAQA**I**QSMNGFQIGM**K**R**L****K**V**Q**L**K**R**S****K**N**D**S**K**P**Y**

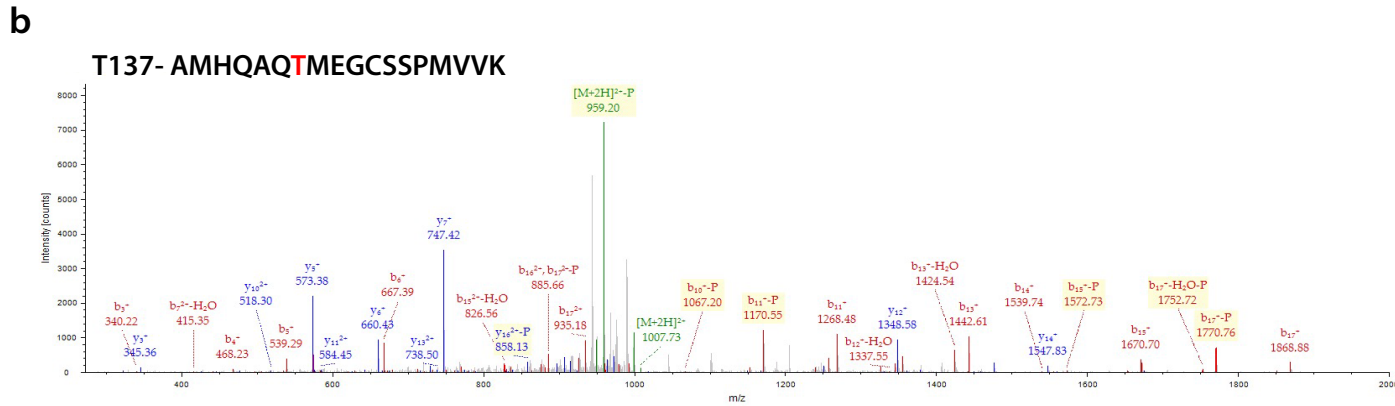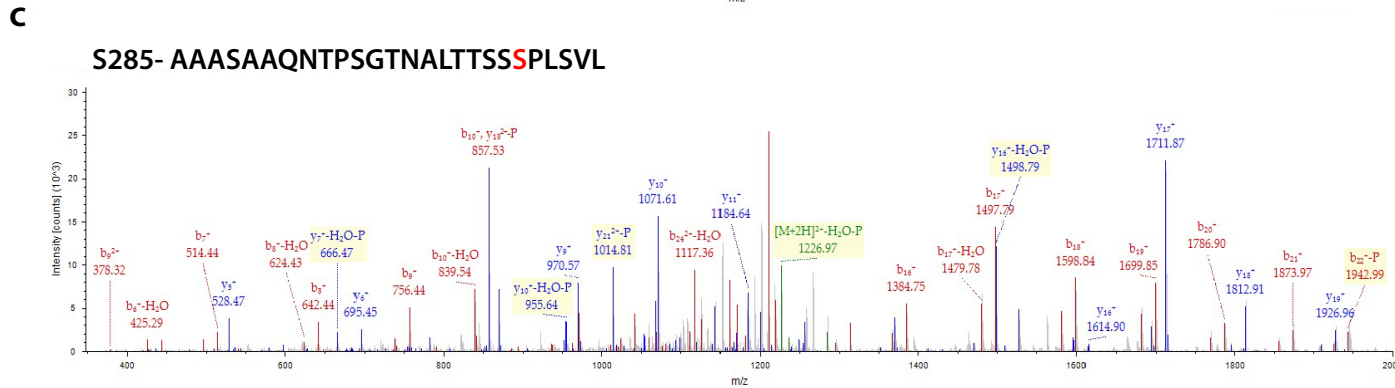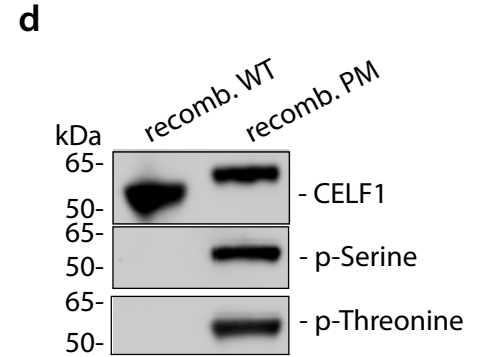

**Supplementary figure 1: Mass spectrometric analysis of CELF1 and detection of phosphomimetic substitutions by immunoblot. a.** CELF1 peptide sequence with lysine (K) and arginine (R) residues in red. Highlighted residues mark CELF1 region with lack of K and R residues for digestion, with SP-repeat dense region in bold. **b, c.** Representative spectra for two of the seven phosphorylation sites identified via mass-spectrometry, the identified site indicated in red in the corresponding peptide sequence above the graphs. **d.** Immunoblot of recombinant, bacterially expressed, purified CELF1 wild-type and phosphomimetic mutant proteins probed with anti-phosphoserine and anti-phosphothreonine antibodies as indicated. CELF1 serves as loading control. Data representative of a minimum of three replicates.
