# Supplementary material for: PKC-mediated phosphorylation governs the stability and function of CELF1 as a driver of EMT in breast epithelial cells
Source: PubMed Central journal article supplement (PMC11585768; doi:10.1016/j.jbc.2024.107826), 2024-09-27
Supplement: mmc2.pdf [file mmc2.pdf]

a

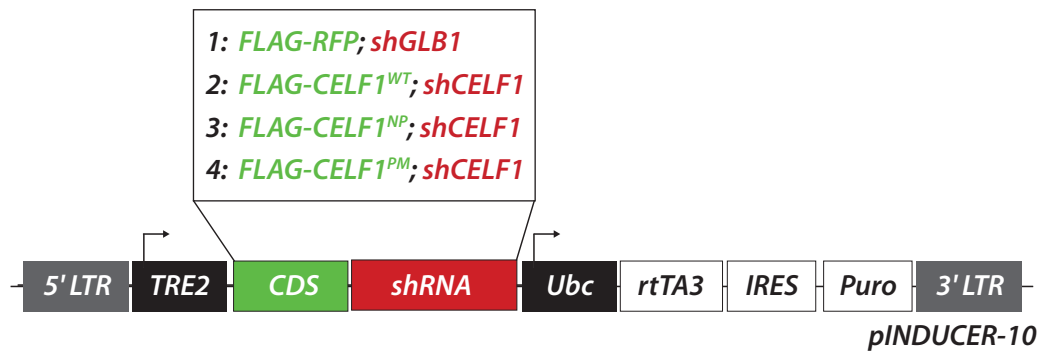

b

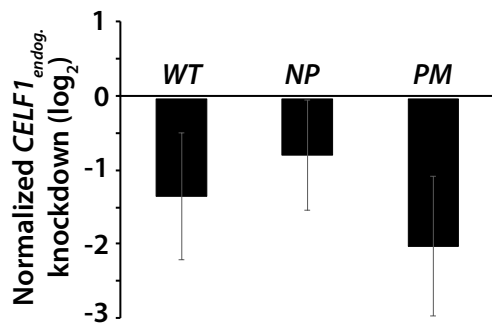

c

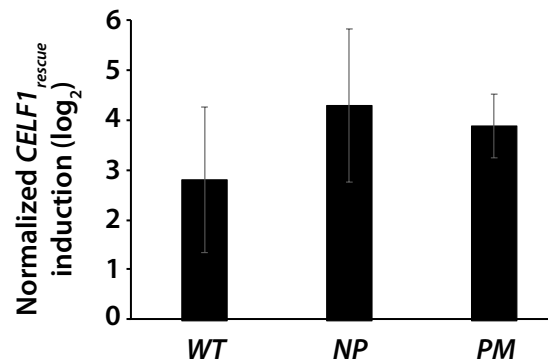

**Supplementary Figure 2: Lentiviral Knockdown/Rescue System.** a. The *pInducer-10* lentiviral expression vector (25) was modified for doxycycline-inducible knockdown of endogenous *CELF1* via the latter's 3' UTR concomitant with expression of FLAG-tagged wild-type *CELF1* (WT), *CELF1*-phosphomutant (NP), or *CELF1* phosphomimetic (PM) coding sequences. The control vector contains a *FLAG-RFP* coding sequence with an shRNA targeting beta-galactocidase (*shGLB1*). b. *TBP*-normalized ( $^{-\Delta\Delta C}$ ) knockdown of endogenous *CELF1* mRNA in MCF-10A cells stably transduced with the indicated vector. Quantitative PCR was performed after 24 hours of treatment with 0.1  $\mu\text{g}/\text{mL}$  doxycycline. Values are expressed relative to those derived from cells transduced with the *FLAG-RFP*;*shGLB1* vector. c. *TBP*-normalized ( $^{-\Delta\Delta C}$ ) induction of vector-encoded *CELF1* mRNA in MCF-10A cells stably transduced with the indicated vector. Again, quantitative PCR was performed after 24 hours of treatment with 0.1  $\mu\text{g}/\text{mL}$  doxycycline. Values are expressed relative to untreated cells, and vector-encoded *CELF1* was differentiated from endogenous *CELF1* via an amplicon including the the sequence encoding the fused FLAG affinity tag. Results for (b) and (c) representative of a minimum of three experiments performed in triplicate; error bars represent standard deviation.
