# Supplementary material for: PKC-mediated phosphorylation governs the stability and function of CELF1 as a driver of EMT in breast epithelial cells
Source: PubMed Central journal article supplement (PMC11585768; doi:10.1016/j.jbc.2024.107826), 2024-09-27
Supplement: mmc6.pdf [file mmc6.pdf]

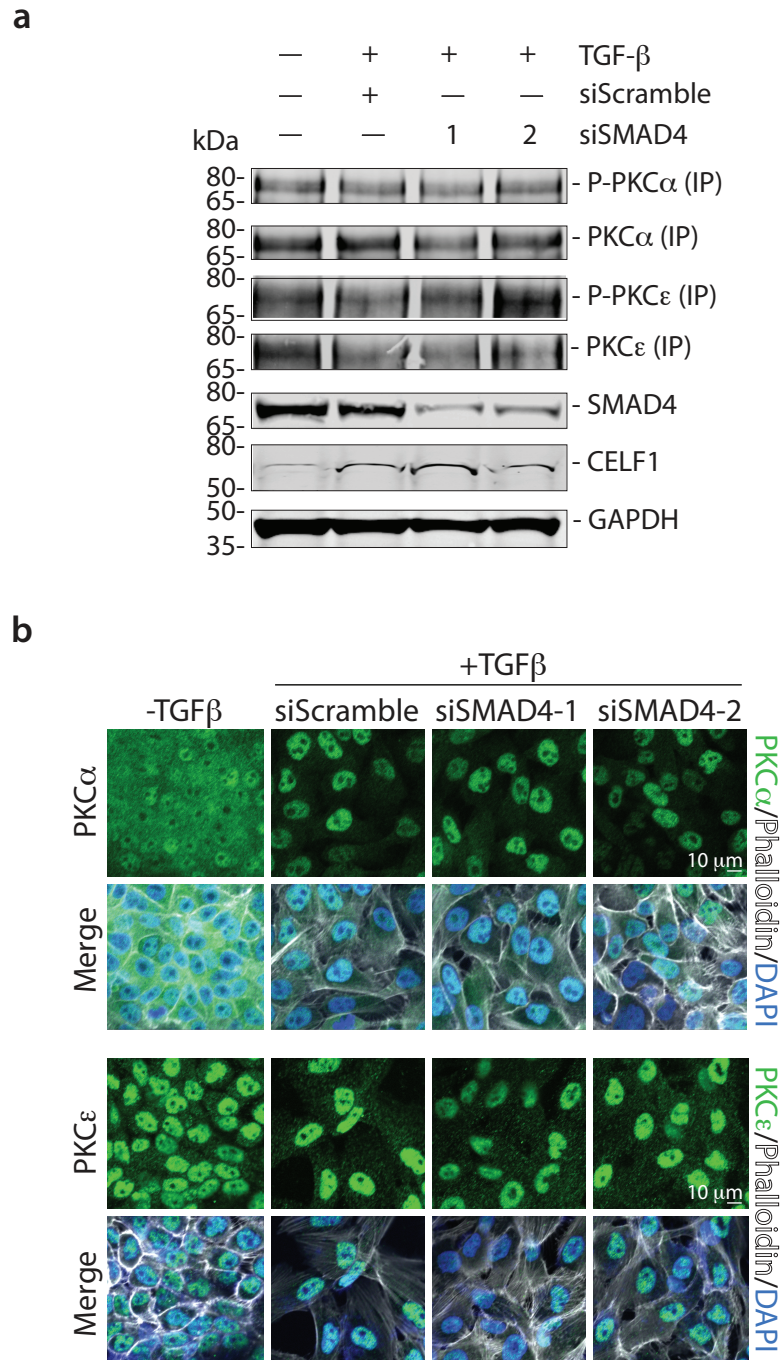

**Supplementary Figure 6: PKC activation, CELF1 stabilization, and PKC subcellular localization are independent of SMAD4 activity.** **a.** Experimental repeat of Figure 4e separately utilizing the two distinct siRNAs in one experimental replicate, demonstrating that SMAD4 knockdown disrupts neither PKC activation nor CELF1 stabilization. GAPDH is a loading control **b.** Experimental repeat of Figure 4f separately utilizing the two distinct siRNAs in one experimental replicate, demonstrating that PKC $\alpha$  localizes to the nucleus upon TGF- $\beta$  treatment, and this is not impacted by SMAD4 knockdown. All data representative of a minimum of three experimental replicates with two distinct siRNAs.
