# Supplementary material for: PKC-mediated phosphorylation governs the stability and function of CELF1 as a driver of EMT in breast epithelial cells
Source: PubMed Central journal article supplement (PMC11585768; doi:10.1016/j.jbc.2024.107826), 2024-09-27
Supplement: mmc8.pdf [file mmc8.pdf]

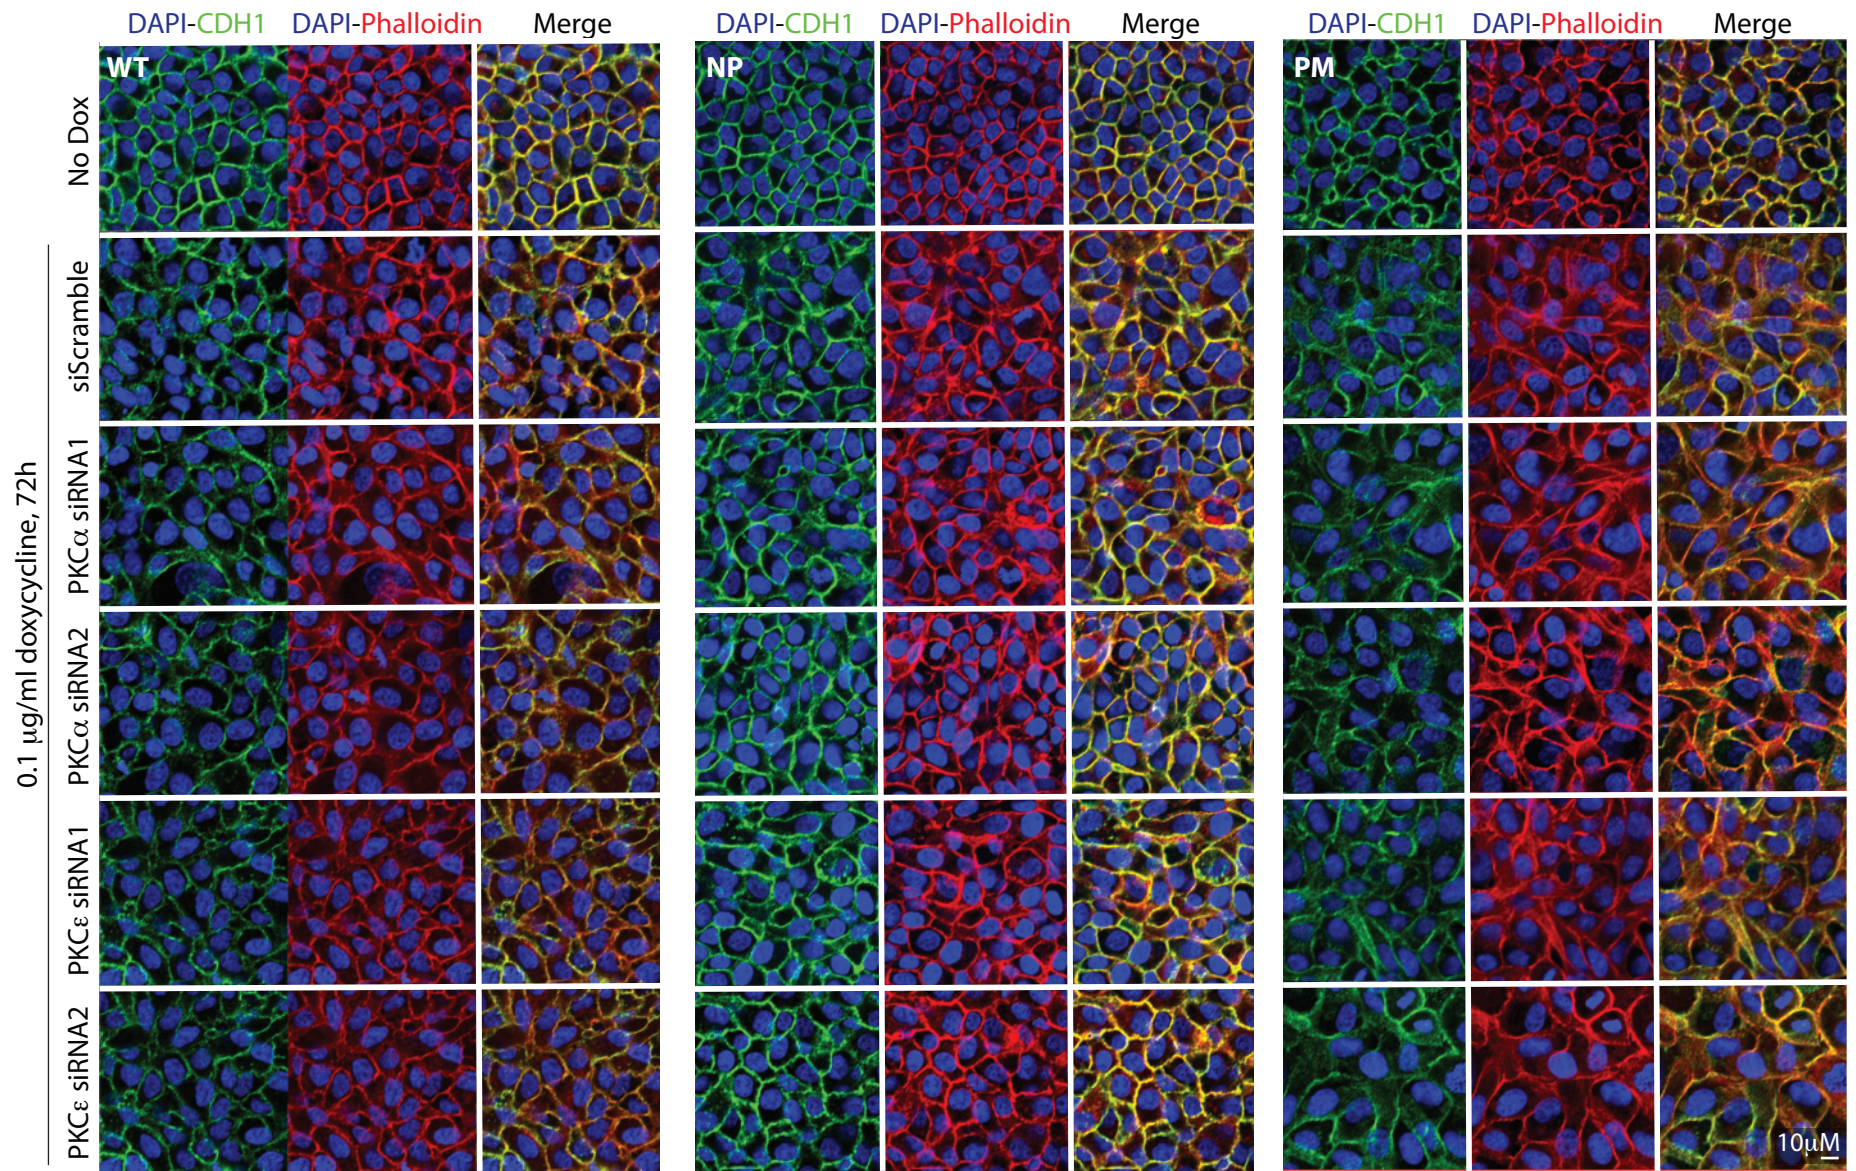

**Supplementary Figure 8:** Full representative dataset of E-cadherin (CDH, green) and actin (Phalloidin, red) subcellular distribution in stably transduced and puromycin-selected MCF-10A cell lines using two distinct siRNAs. The cell lines were transfected with 20 nM of the indicated siRNAs, and the following day the indicated CELF1 variants were induced with 0.1 µg/mL doxycycline for 72 hours. No Dox = No treatment. DAPI nuclear counterstain is blue. Images collected using the 40X oil immersion objective lens on a Nikon A1 confocal microscope and processed on ImageJ software. Data representative of a minimum of four individual experiments.
