# Supplementary material for: PKC-mediated phosphorylation governs the stability and function of CELF1 as a driver of EMT in breast epithelial cells
Source: PubMed Central journal article supplement (PMC11585768; doi:10.1016/j.jbc.2024.107826), 2024-09-27
Supplement: mmc10.pdf [file mmc10.pdf]

**Supplementary Table 1: Abbreviated Mass Spectrometry Data for Identified Phosphorylation Sites**

| <b>Peptide sequence</b>    | <b>PTM site</b> | <b>Peptide Modified Sequence</b> |
|----------------------------|-----------------|----------------------------------|
| AMHQAQTMEGCSSPMVVK         | T173            | AMHQAQT[+80]MEGCSSPMVVK          |
| AMHQAQTMEGCSSPMVVK         | S178            | AMHQAQTMEGCS[+80]SPMVVK          |
| AAAASAAQNTPSGTNALTSSSPLSVL | S285/286        | AAAASAAQNTPSGTNALTSSS[+80]PLSVL  |
| SVLTSSGSPSSSSNSVNPIASL     | S295/296/298    | SVLTSSGSS[+80]PSSSSNSVNPIASL     |

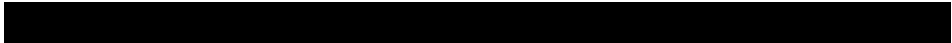

| <b>Precursor Charge</b> | <b>mass/charge</b> | <b>Ion score</b> | <b>Ions matched</b> |
|-------------------------|--------------------|------------------|---------------------|
| 2                       | 1007.90997         | 52               | 11/192              |
| 2                       | 1044.42981         | 40               | 16/192              |
| 2                       | 1284.60864         | 49               | 23/260              |
| 2                       | 1166.5271          | 58               | 14/206              |
