# Supplementary material for: PKC-mediated phosphorylation governs the stability and function of CELF1 as a driver of EMT in breast epithelial cells
Source: PubMed Central journal article supplement (PMC11585768; doi:10.1016/j.jbc.2024.107826), 2024-09-27
Supplement: mmc11.pdf [file mmc11.pdf]

**Supplementary Table 2:** List of antibodies used for immunoblots and immunofluorescence.

| <b>Antibody name</b>       | <b>Species</b> | <b>Vendor</b>                       | <b>Catalog no.</b> | <b>Dilution</b> |
|----------------------------|----------------|-------------------------------------|--------------------|-----------------|
| CELF1                      | mouse          | Abcam                               | ab9549             | 1:1,000         |
| E-cadherin                 | rabbit         | Cell signaling Technology           | 3195               | 1:2,000         |
| FLAG-tag (M2)              | mouse          | Sigma                               | F1804              | 1:2,000         |
| Vimentin                   | mouse          | Abcam                               | ab8978             | 1:1,000         |
| SMAD4                      | rabbit         | Cell signaling Technology           | 38454              | 1:1,000         |
| HA-tag                     | rabbit         | Cell signaling Technology           | 3724               | 1:1,000         |
| GAPDH                      | mouse          | EMD Millipore                       | MAB374             | 1:2,000         |
| HSP90                      | mouse          | BD transduction                     | 610419             | 1:1,000         |
| phosphoserine              | rabbit         | Abcam                               | ab9332             | 1:1,000         |
| phosphothreonine           | rabbit         | Abcam                               | ab9337             | 1:1,000         |
| phosphotyrosine            | mouse          | Cell signaling Technology           | 9411S              | 1:1,000         |
| PKC alpha                  | rabbit         | Cell signaling Technology           | 2056S              | 1:1,000         |
| PKC delta                  | rabbit         | Cell signaling Technology           | 2055               | 1:1,000         |
| PKC epsilon                | rabbit         | Cell signaling Technology           | 9616               | 1:1,000         |
| Phospho-PKC (pan)          | rabbit         | Cell signaling Technology           | 38938              | 1:1,000         |
| Peroxidase IgG anti-mouse  | goat           | Jackson ImmunoResearch laboratories | 115-035-174        | 1:10,000        |
| Peroxidase IgG anti-rabbit | rabbit         | Jackson ImmunoResearch laboratories | 211-032-171        | 1:10,000        |
| DyLight-680 anti-mouse     | goat           | Cell signaling Technology           | 5470S              | 1:12,000        |
| DyLight-800 anti-rabbit    | mouse          | Cell signaling Technology           | 5151S              | 1:12,000        |
| AF555 anti-rabbit          | donkey         | Jackson ImmunoResearch laboratories | 711-565-152        | 1:1000          |
| AF488 anti-mouse           | goat           | Jackson ImmunoResearch laboratories | 115-545-071        | 1:1000          |
| AF647 phalloidin           | N/A            | Cell signaling Technology           | 8940               | 330 nM          |
|                            |                |                                     |                    |                 |
